# Supplementary material for: GBE1 Promotes Glioma Progression by Enhancing Aerobic Glycolysis through Inhibition of FBP1
Source: MDPI journal article supplement (doi:10.3390/cancers15051594), 2023-03-03
Supplement: s1 [file s1]

Figure.2B

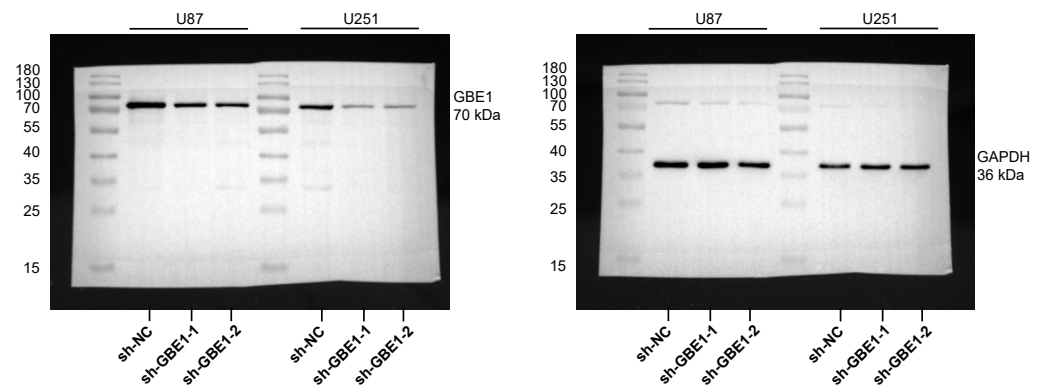

| Line  | U87<br>sh-NC | U87<br>sh-GBE-1 | U87<br>sh-GBE-2 | U251<br>sh-NC | U251<br>sh-GBE-1 | U251<br>sh-GBE-2 |
|-------|--------------|-----------------|-----------------|---------------|------------------|------------------|
| GBE1  | 47795.401    | 21391.095       | 28152.338       | 28727.53      | 9711.874         | 8417.589         |
| GAPDH | 37589.874    | 29432.024       | 34571.874       | 24693.752     | 26972.681        | 25732.489        |

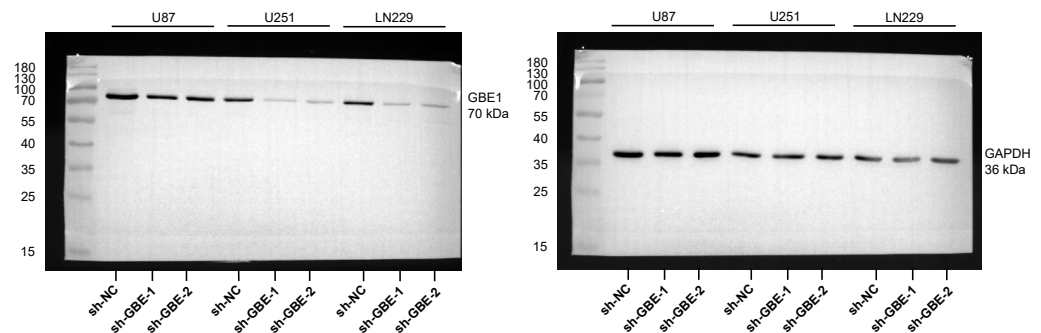

| Line      | U87<br>sh-NC  | U87<br>sh-<br>GBE-<br>1 | U87<br>sh-<br>GBE-<br>2 | U251<br>sh-NC | U251<br>sh-<br>GBE-<br>1 | U251<br>sh-<br>GBE-<br>2 | LN229<br>sh-NC | LN229<br>sh-<br>GBE-<br>1 | LN229<br>sh-<br>GBE-<br>2 |
|-----------|---------------|-------------------------|-------------------------|---------------|--------------------------|--------------------------|----------------|---------------------------|---------------------------|
| GBE<br>1  | 48174.<br>693 | 29799.<br>551           | 27791.<br>773           | 38051.<br>087 | 8200.8<br>53             | 9405.<br>388             | 37215.<br>894  | 9590.4<br>39              | 9762.6<br>31              |
| GAP<br>DH | 31944.<br>258 | 33816.<br>359           | 37603.<br>702           | 36099.<br>087 | 38178.<br>037            | 9405.<br>388             | 29620.<br>844  | 21353.<br>187             | 25775.<br>409             |

**Figure.4C**

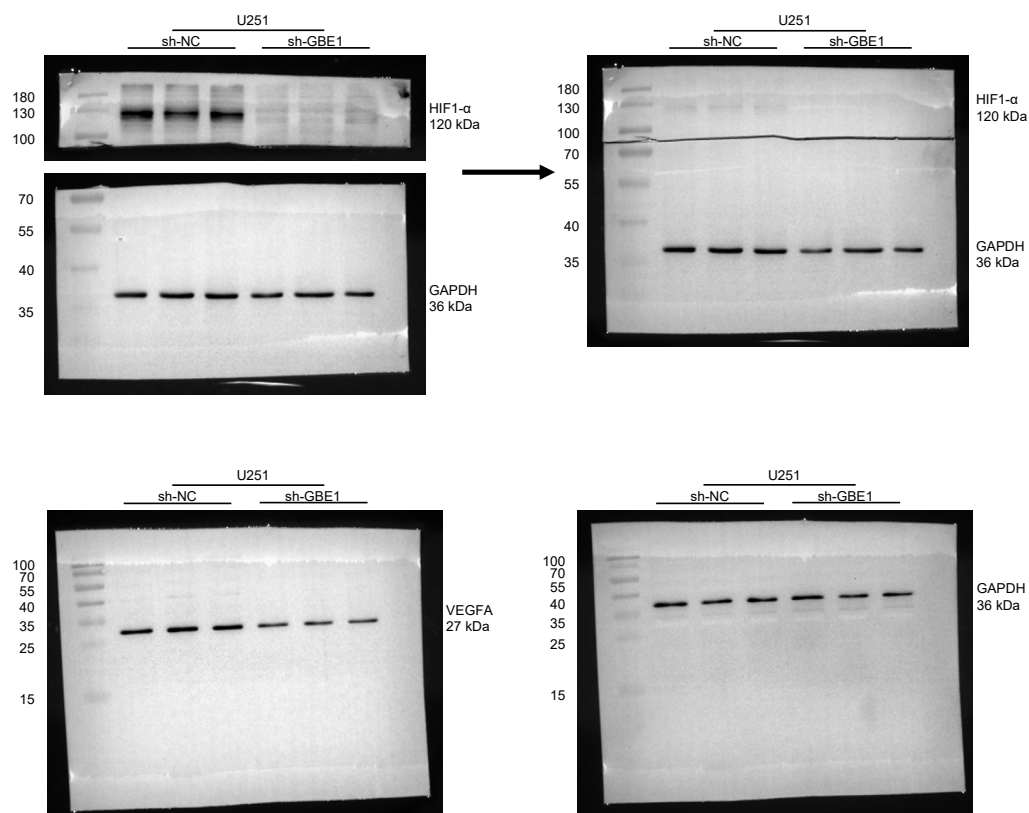

| Line   | U251<br>sh-NC | U251<br>sh-NC | U251<br>sh-NC | U251<br>sh-GBE1 | U251<br>sh-GBE1 | U251<br>sh-GBE1 |
|--------|---------------|---------------|---------------|-----------------|-----------------|-----------------|
| HIF1-a | 24261.782     | 22373.439     | 23069.317     | 7569.811        | 8055.447        | 9738.175        |
| GAPDH  | 21147.246     | 25525.56      | 26559.681     | 20686.66        | 26623.731       | 18992.296       |
| VEGFA  | 19664.024     | 23162.439     | 21047.489     | 13282.296       | 12702.589       | 11751.175       |
| GAPDH  | 20399.267     | 16904.51      | 20227.752     | 22911.489       | 17539.711       | 17792.125       |

**Figure.4C**

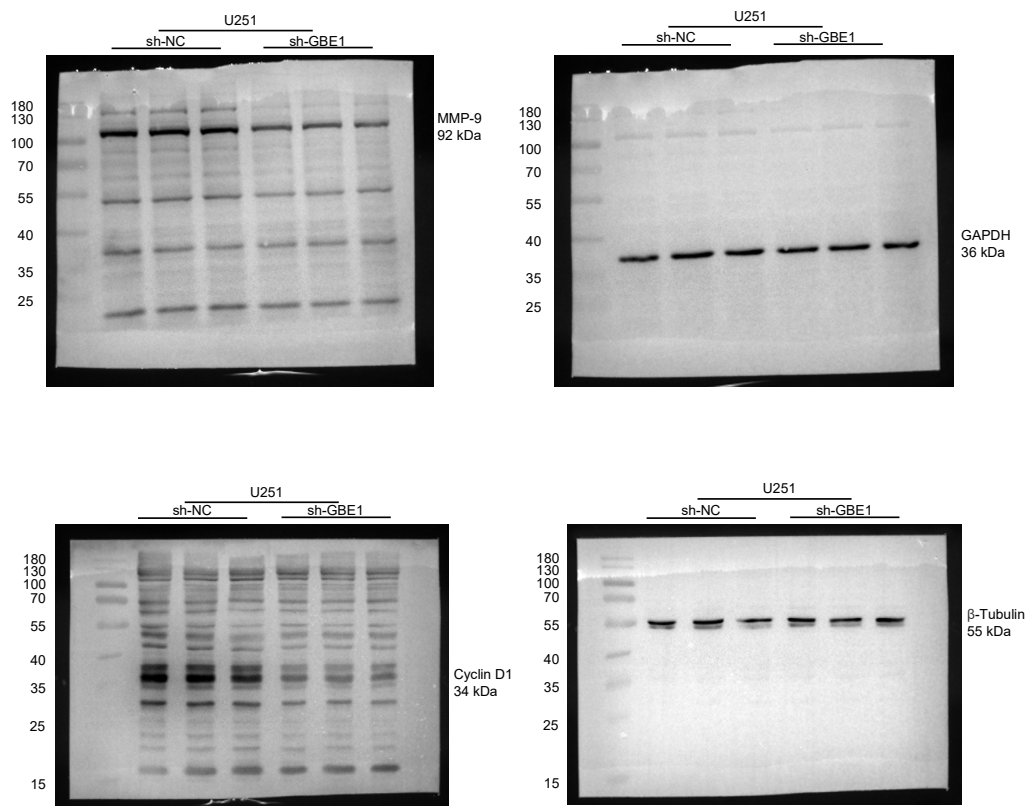

| Line          | U251<br>sh-NC | U251<br>sh-NC | U251<br>sh-NC | U251<br>sh-GBE1 | U251<br>sh-GBE1 | U251<br>sh-GBE1 |
|---------------|---------------|---------------|---------------|-----------------|-----------------|-----------------|
| MMP-9         | 136876.978    | 140336.635    | 121645.271    | 73466.907       | 60344.907       | 62236.149       |
| GAPDH         | 40573.116     | 45568.016     | 38536.48      | 36446.823       | 41635.309       | 44456.652       |
| Cyclin<br>D1  | 23905.782     | 23363.004     | 19434.196     | 8575.69         | 8085.175        | 8316.811        |
| β-<br>Tubulin | 18393.317     | 24054.368     | 19836.903     | 21563.418       | 20771.832       | 20783.882       |

**Figure.4C**

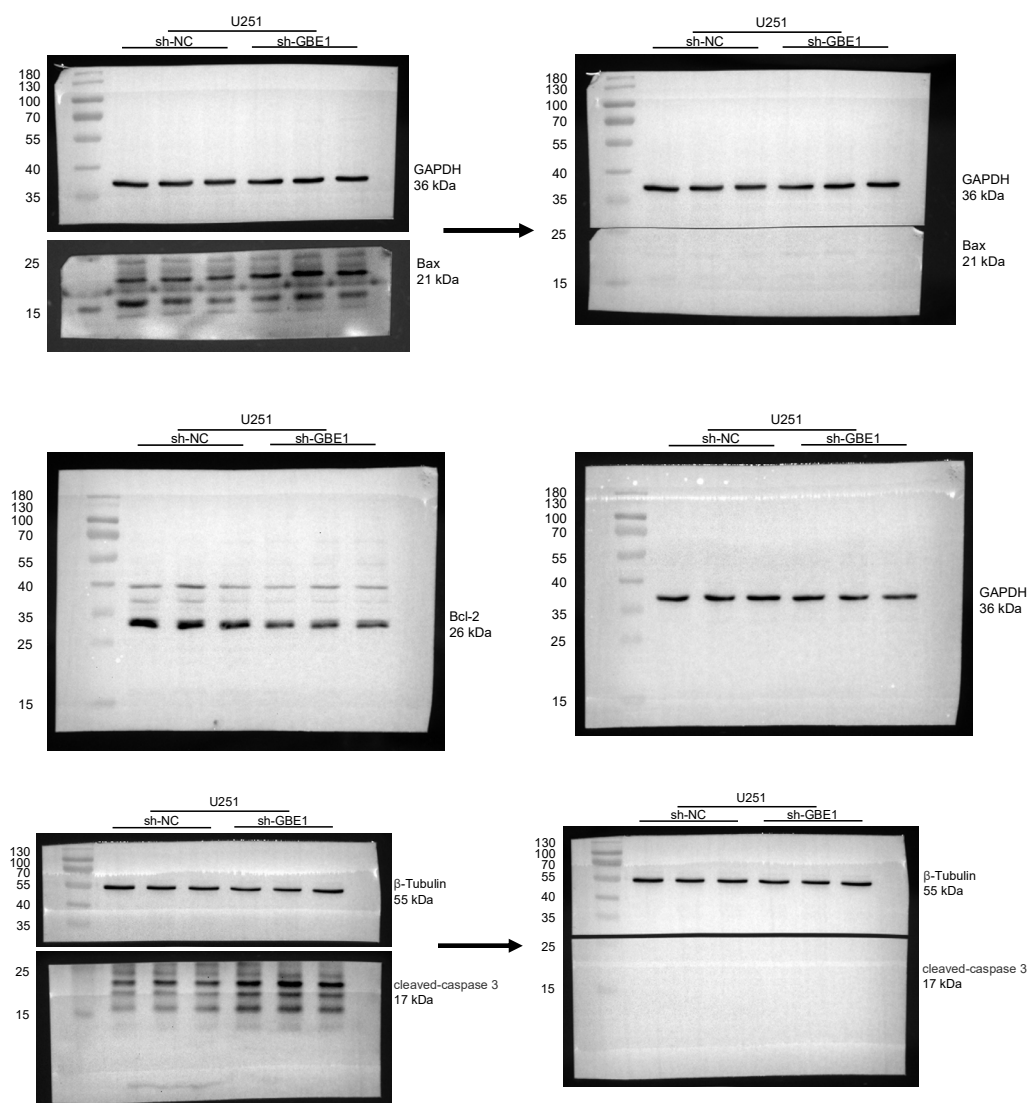

| Line              | U251<br>sh-NC  | U251<br>sh-NC  | U251<br>sh-NC  | U251<br>sh-GBE1 | U251<br>sh-GBE1 | U251<br>sh-GBE1 |
|-------------------|----------------|----------------|----------------|-----------------|-----------------|-----------------|
| Bax               | 136876.97<br>8 | 140336.63<br>5 | 121645.27<br>1 | 73466.90<br>7   | 60344.90<br>7   | 62236.14<br>9   |
| GAPDH             | 40573.116      | 45568.016      | 38536.48       | 36446.82<br>3   | 41635.30<br>9   | 44456.65<br>2   |
| Bcl-2             | 23905.782      | 23363.004      | 19434.196      | 8575.69         | 8085.175        | 8316.811        |
| GAPDH             | 18393.317      | 24054.368      | 19836.903      | 21563.41<br>8   | 20771.83<br>2   | 20783.88<br>2   |
| Cleaved-caspase 3 | 42804.652      | 45524.409      | 44719.258      | 66763.01<br>6   | 75467.23<br>8   | 70220.20<br>8   |
| β-Tubulin         | 87307.794      | 74552.329      | 71169.572      | 63500.67<br>3   | 60758.53        | 80389.03<br>7   |



Figure.4E

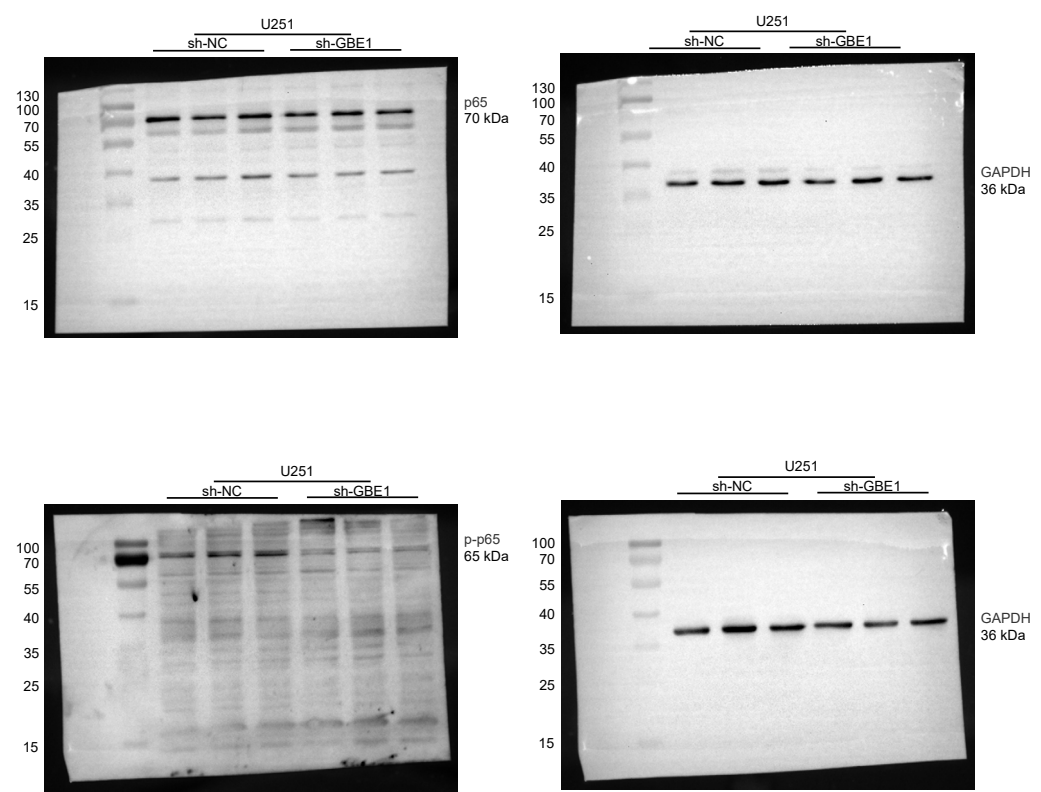

| Line  | U251<br>sh-NC | U251<br>sh-NC | U251<br>sh-NC | U251<br>sh-GBE1 | U251<br>sh-GBE1 | U251<br>sh-GBE1 |
|-------|---------------|---------------|---------------|-----------------|-----------------|-----------------|
| P65   | 50969.72      | 43612.6       | 58148.97      | 46669.62        | 49053.89        | 46816.99        |
| GAPDH | 29420.82      | 36703.17      | 39889.6       | 29826.72        | 37994.17        | 34929.48        |
| p-p65 | 60021.92      | 71264.33      | 71259.62      | 38247.38        | 30737.38        | 33168.38        |
| GAPDH | 54667.25      | 81718.28      | 67378.18      | 55630.18        | 42310.69        | 54770.47        |

Figure.4E

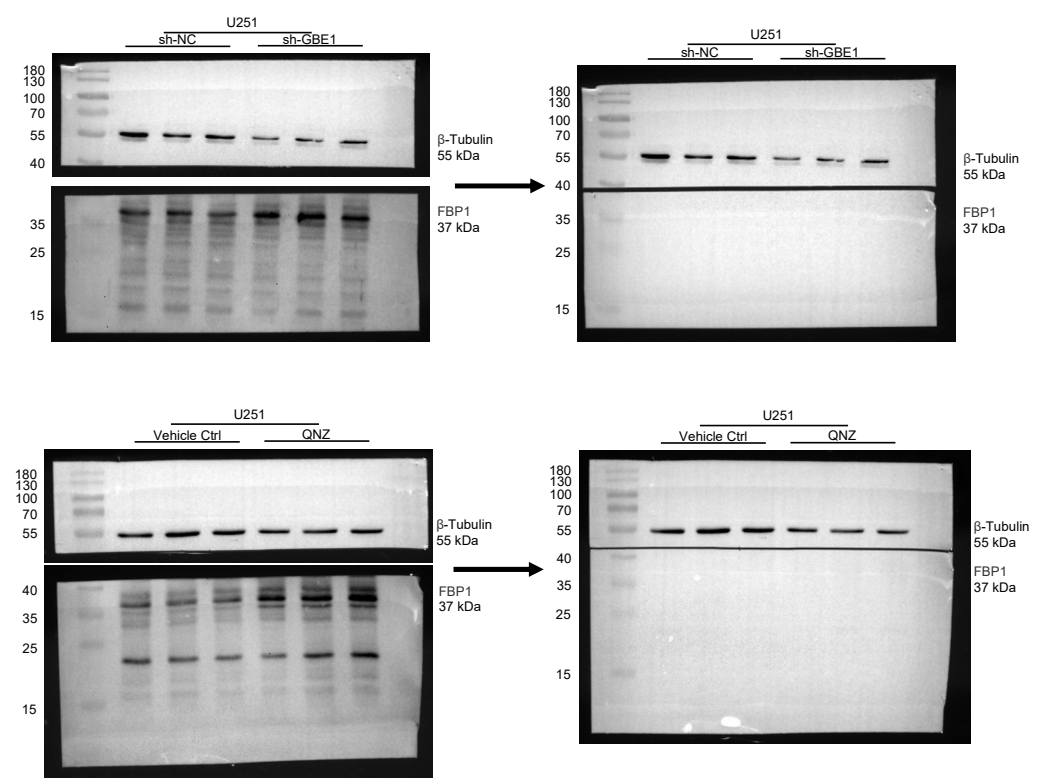

| Line                 | U251<br>sh-NC | U251<br>sh-NC | U251<br>sh-NC | U251<br>sh-GBE1 | U251<br>sh- GBE1 | U251<br>sh- GBE1 |
|----------------------|---------------|---------------|---------------|-----------------|------------------|------------------|
| FBP1                 | 81020.241     | 67495.927     | 85599.392     | 106994.756      | 119733.141       | 107647.291       |
| $\beta$ -<br>Tubulin | 21394.024     | 12912.296     | 16060.196     | 8908.225        | 9800.054         | 12279.589        |

| Line                 | U251<br>Vehicle<br>Ctrl | U251<br>Vehicle<br>Ctrl | U251<br>Vehicle<br>Ctrl | U251<br>QNZ | U251<br>QNZ | U251<br>QNZ |
|----------------------|-------------------------|-------------------------|-------------------------|-------------|-------------|-------------|
| FBP1                 | 40249.844               | 37199.087               | 37924.43                | 60361.543   | 73635.614   | 76614.894   |
| $\beta$ -<br>Tubulin | 69133.371               | 88290.614               | 73528.936               | 56789.765   | 63206.543   | 74308.622   |

Figure.4E

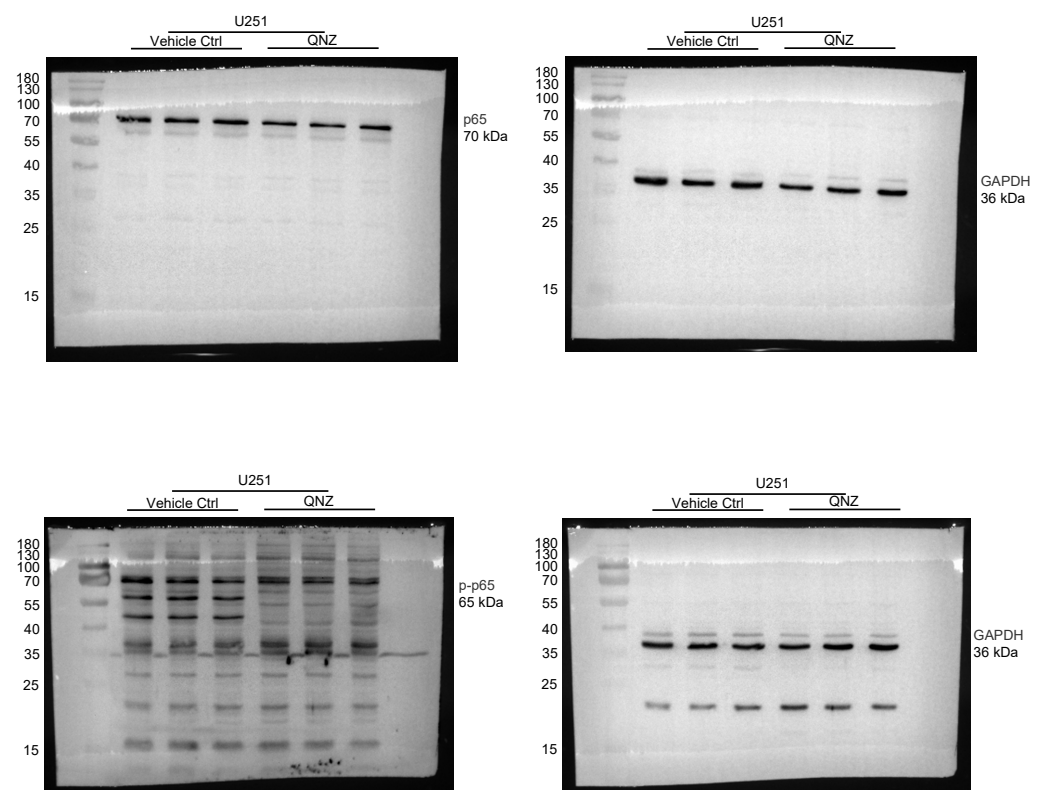

| Line  | U251<br>Vehicle<br>Ctrl | U251<br>Vehicle<br>Ctrl | U251<br>Vehicle<br>Ctrl | U251<br>QNZ | U251<br>QNZ | U251<br>QNZ |
|-------|-------------------------|-------------------------|-------------------------|-------------|-------------|-------------|
| P65   | 77645.643               | 74760.007               | 80976.007               | 63173.522   | 59906.765   | 69598.865   |
| GAPDH | 80419.472               | 63033.593               | 66642.765               | 51321.179   | 55810.714   | 61955.108   |
| p-p65 | 63978.329               | 76545.3                 | 67236.3                 | 35811.3     | 32058.543   | 30755.966   |
| GAPDH | 73070.057               | 76662.3                 | 75233.179               | 70397.229   | 78868.836   | 78060.057   |

Figure.5A

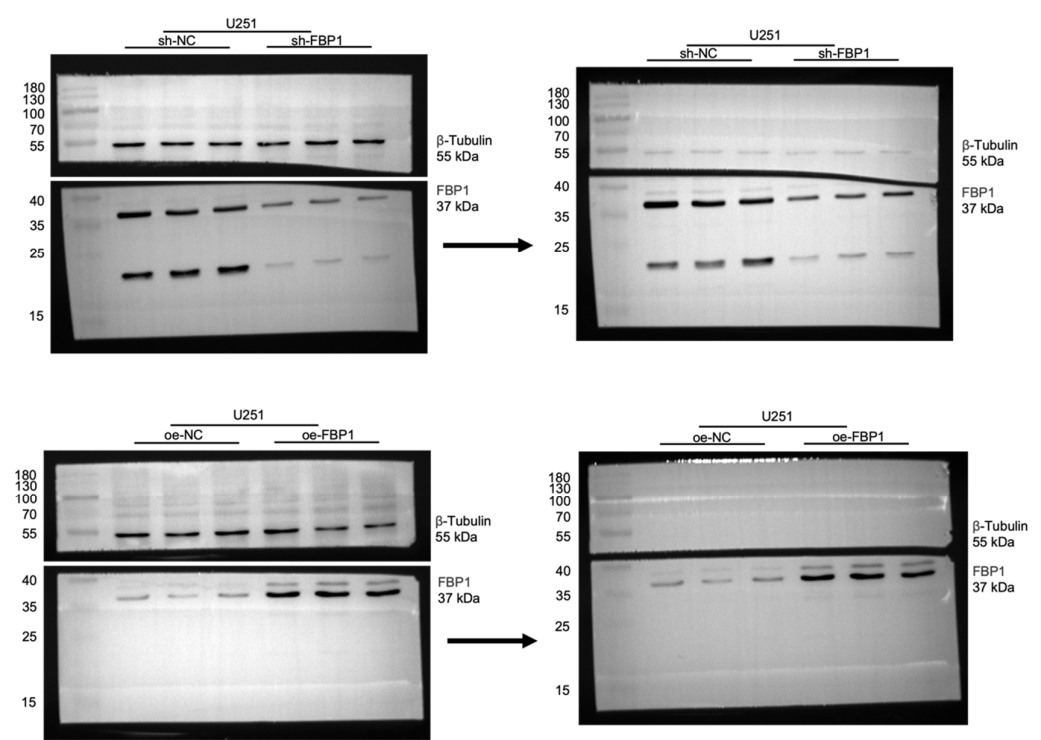

| Line                 | U251<br>sh-NC | U251<br>sh-NC | U251<br>sh-NC | U251<br>sh-FBP1 | U251<br>sh-FBP1 | U251<br>sh-FBP1 |
|----------------------|---------------|---------------|---------------|-----------------|-----------------|-----------------|
| FBP1                 | 24811.125     | 20422.518     | 20092.276     | 10477.426       | 9593.012        | 7068.962        |
| $\beta$ -<br>Tubulin | 62937.643     | 53102.492     | 51904.765     | 58746.128       | 71700.38        | 82818.622       |

| Line                 | U251<br>oe-NC | U251<br>oe-NC | U251<br>oe-NC | U251<br>oe-FBP1 | U251<br>oe-FBP1 | U251<br>oe-FBP1 |
|----------------------|---------------|---------------|---------------|-----------------|-----------------|-----------------|
| FBP1                 | 19605.581     | 9625.974      | 17243.702     | 67320.643       | 84230.957       | 94967.815       |
| $\beta$ -<br>Tubulin | 72615.522     | 60892.25      | 75297.492     | 86516.229       | 72555.279       | 80705.844       |

Figure.6A

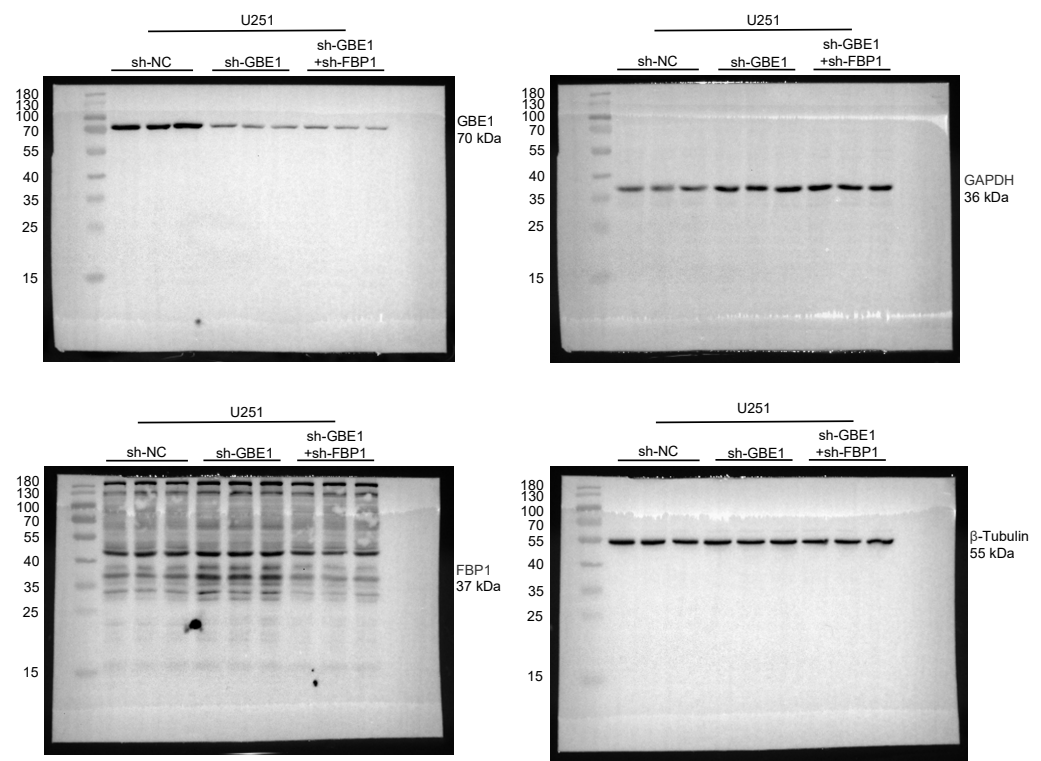

| Line              | U251<br>sh-NC | U251<br>sh-NC | U251<br>sh-NC | U251<br>sh-<br>GBE1 | U251<br>sh-<br>GBE1 | U251<br>sh-<br>GBE1 | U251<br>sh-<br>GBE1<br>+sh-<br>FBP1 | U251<br>sh-<br>GBE1<br>+sh-<br>FBP1 | U251<br>sh-<br>GBE1<br>+sh-<br>FBP1 |
|-------------------|---------------|---------------|---------------|---------------------|---------------------|---------------------|-------------------------------------|-------------------------------------|-------------------------------------|
| GBE<br>1          | 20513.<br>74  | 16066.<br>79  | 19593.<br>569 | 6689.7<br>9         | 4713.7<br>19        | 4470.0<br>33        | 4209.2<br>55                        | 3669.6<br>69                        | 3780.7<br>9                         |
| GAP<br>DH         | 12410.<br>154 | 10296.<br>083 | 11156.<br>326 | 14621.<br>326       | 13687.<br>79        | 17337.<br>447       | 16030.<br>205                       | 14698.<br>083                       | 14733.<br>912                       |
| FBP<br>1          | 10806.<br>033 | 9005.0<br>12  | 11615.<br>79  | 17009.<br>497       | 16139.<br>326       | 14905.<br>083       | 8487.6<br>69                        | 7466.5<br>48                        | 7369.8<br>41                        |
| β-<br>Tubu<br>lin | 17511.<br>033 | 15070.<br>083 | 15342.<br>669 | 16154.<br>912       | 14759.<br>497       | 15238.<br>205       | 13475.<br>79                        | 13926.<br>619                       | 15226.<br>033                       |

Figure.S1A

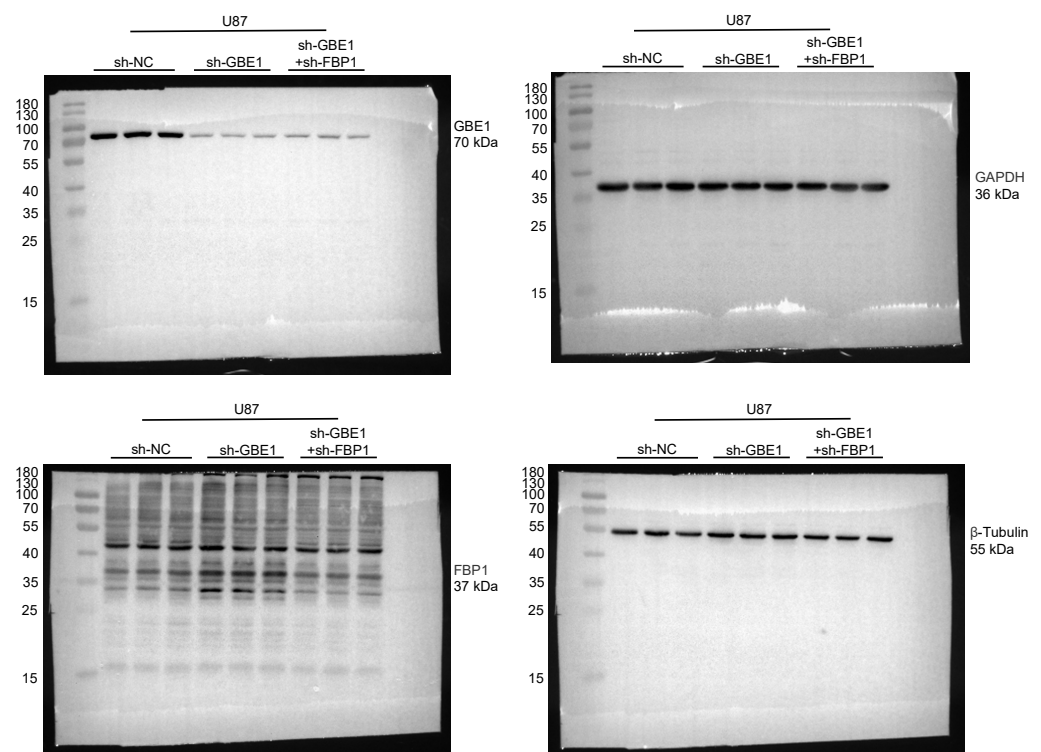

| Line              | U87<br>sh-NC  | U87<br>sh-NC  | U87<br>sh-NC  | U87<br>sh-<br>GBE1 | U87<br>sh-<br>GBE1 | U87<br>sh-<br>GBE1 | U87<br>sh-<br>GBE1<br>+sh-<br>FBP1 | U87<br>sh-<br>GBE1<br>+sh-<br>FBP1 | U87<br>sh-<br>GBE1<br>+sh-<br>FBP1 |
|-------------------|---------------|---------------|---------------|--------------------|--------------------|--------------------|------------------------------------|------------------------------------|------------------------------------|
| GBE<br>1          | 19252.<br>205 | 18091.<br>569 | 15050.<br>74  | 4019.5<br>48       | 3146.4<br>97       | 2812.9<br>62       | 3506.8<br>61                       | 4103.9<br>62                       | 3938.8<br>91                       |
| GAP<br>DH         | 19427.<br>447 | 16202.<br>619 | 18572.<br>326 | 17787.<br>033      | 17137.<br>79       | 17149.<br>669      | 16179.<br>912                      | 13738.<br>79                       | 13216.<br>497                      |
| FBP<br>1          | 10379.<br>619 | 11263.<br>255 | 11758.<br>79  | 17470.<br>74       | 17872.<br>962      | 17081.<br>619      | 10931.<br>376                      | 10549.<br>376                      | 10612.<br>376                      |
| β-<br>Tubu<br>lin | 14876.<br>861 | 14644.<br>376 | 14746.<br>083 | 16487.<br>962      | 15602.<br>669      | 15174.<br>083      | 15834.<br>255                      | 15384.<br>669                      | 16718.<br>619                      |

Figure.6N

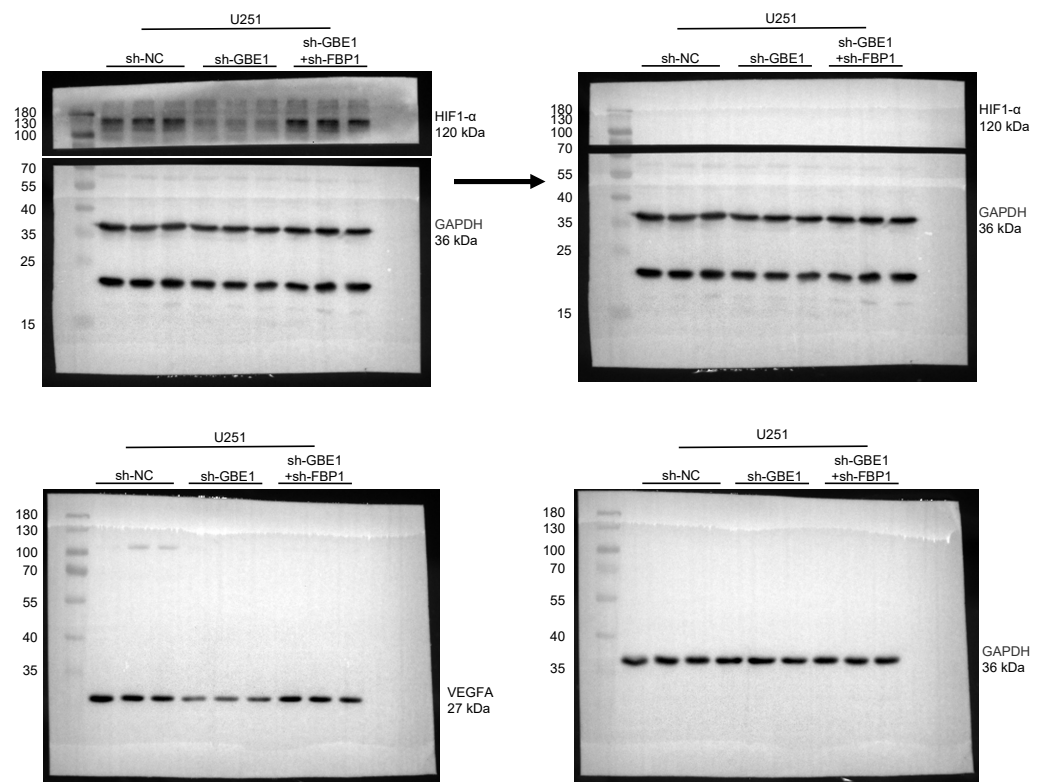

| Line        | U251<br>sh-NC | U251<br>sh-NC | U251<br>sh-NC | U251<br>sh-<br>GBE1 | U251<br>sh-<br>GBE1 | U251<br>sh-<br>GBE1 | U251<br>sh-<br>GBE1<br>+sh-<br>FBP1 | U251<br>sh-<br>GBE1<br>+sh-<br>FBP1 | U251<br>sh-<br>GBE1<br>+sh-<br>FBP1 |
|-------------|---------------|---------------|---------------|---------------------|---------------------|---------------------|-------------------------------------|-------------------------------------|-------------------------------------|
| HIF-<br>1-α | 51102.<br>752 | 56174.<br>652 | 57987.<br>945 | 31581.<br>045       | 26515.<br>267       | 29629.<br>631       | 55962.<br>702                       | 58294.<br>581                       | 48604.<br>338                       |
| GAP<br>DH   | 69780.<br>53  | 54642.<br>874 | 51918.<br>095 | 48992.<br>338       | 49679.<br>288       | 45776.<br>924       | 53991.<br>752                       | 52990.<br>803                       | 50035.<br>823                       |
| VEG<br>FA   | 63470.<br>24  | 49025.<br>46  | 41418.<br>05  | 22661.<br>46        | 23215.<br>82        | 27120.<br>05        | 44070.<br>22                        | 42178.<br>63                        | 36482.<br>51                        |
| GAP<br>DH   | 63554.<br>12  | 56902.<br>75  | 52984.<br>05  | 59355.<br>41        | 61028.<br>7         | 47949.<br>99        | 51013.<br>87                        | 49633.<br>51                        | 52311.<br>58                        |

Figure.6N

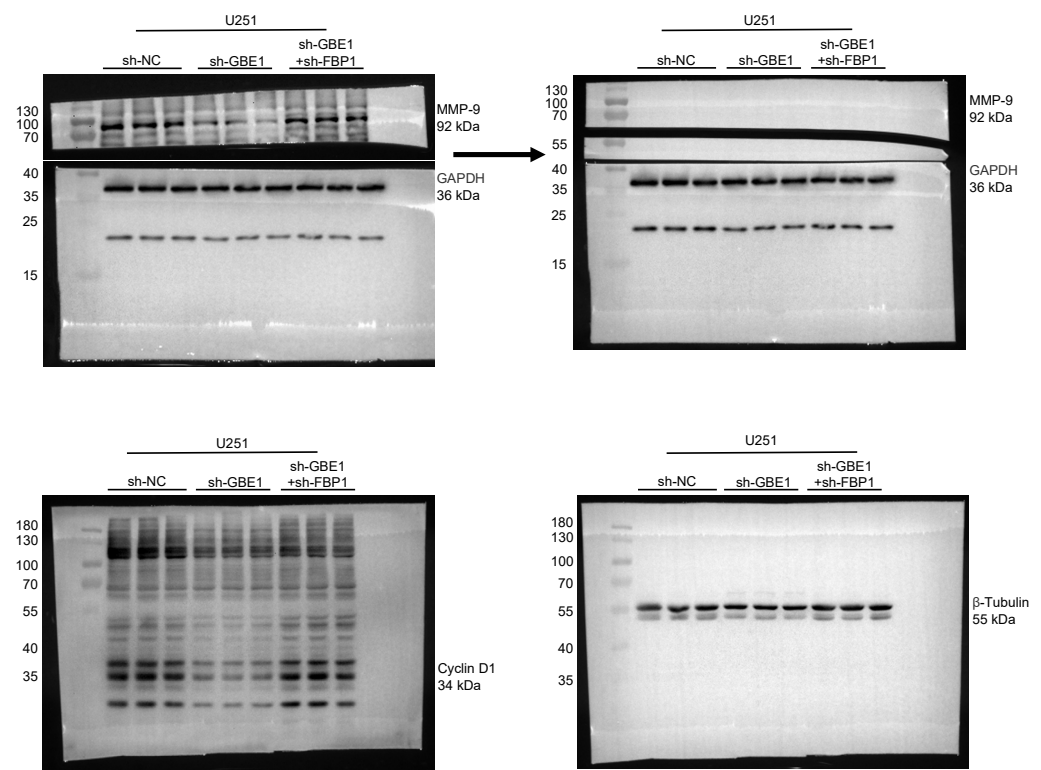

| Line      | U251<br>sh-NC | U251<br>sh-NC | U251<br>sh-NC | U251<br>sh-<br>GBE1 | U251<br>sh-<br>GBE1 | U251<br>sh-<br>GBE1 | U251<br>sh-<br>GBE1<br>+sh-<br>FBP1 | U251<br>sh-<br>GBE1<br>+sh-<br>FBP1 | U251<br>sh-<br>GBE1<br>+sh-<br>FBP1 |
|-----------|---------------|---------------|---------------|---------------------|---------------------|---------------------|-------------------------------------|-------------------------------------|-------------------------------------|
| MMP-9     | 58212.459     | 54605.53      | 46156.459     | 33070.723           | 33050.016           | 40191.652           | 49650.409                           | 50413.823                           | 45373.924                           |
| GAPDH     | 75934.288     | 68647.116     | 61814.388     | 63275.874           | 61073.995           | 65646.995           | 61676.288                           | 58100.116                           | 65419.723                           |
| Cyclin D1 | 61200.02      | 62932.58      | 52211.58      | 24895.05            | 17175.22            | 24605.99            | 49753.87                            | 54604.63                            | 40755.15                            |
| β-Tubulin | 58147.41      | 46642.8       | 55682.51      | 53521.29            | 52868.17            | 52740.17            | 56045.22                            | 56711.1                             | 57797.51                            |



Figure.6N

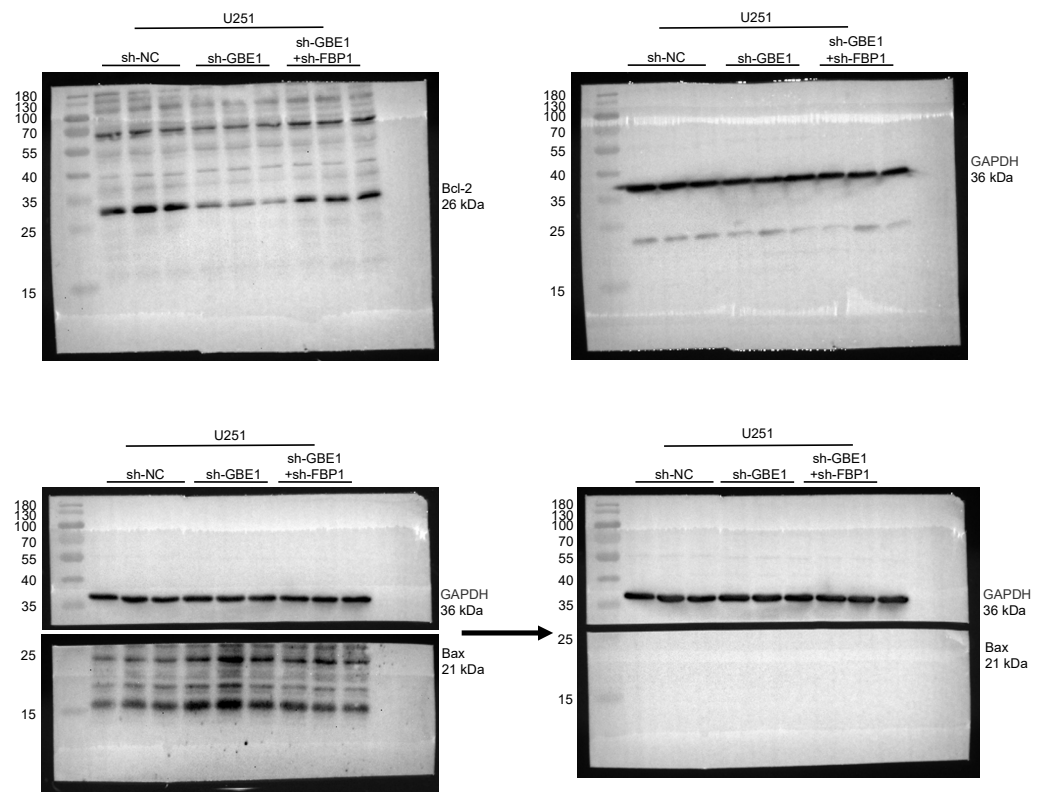

| Line  | U251<br>sh-NC | U251<br>sh-NC | U251<br>sh-NC | U251<br>sh-<br>GBE1 | U251<br>sh-<br>GBE1 | U251<br>sh-<br>GBE1 | U251<br>sh-<br>GBE1<br>+sh-<br>FBP1 | U251<br>sh-<br>GBE1<br>+sh-<br>FBP1 | U251<br>sh-<br>GBE1<br>+sh-<br>FBP1 |
|-------|---------------|---------------|---------------|---------------------|---------------------|---------------------|-------------------------------------|-------------------------------------|-------------------------------------|
| Bcl-2 | 14912.205     | 17257.962     | 13653.033     | 6551.083            | 5341.841            | 3417.376            | 9104.962                            | 11581.619                           | 13984.619                           |
| GAPDH | 20695.033     | 20030.74      | 17597.912     | 15625.326           | 13267.255           | 18736.811           | 13288.962                           | 12527.619                           | 13102.912                           |
| Bax   | 6504.962      | 7083.205      | 7935.548      | 12276.447           | 18476.983           | 12836.326           | 11464.912                           | 12555.205                           | 9881.74                             |
| GAPDH | 19151.033     | 17735.841     | 15907.326     | 16915.276           | 16361.447           | 17408.569           | 19316.154                           | 17876.497                           | 20183.983                           |

Figure.6N

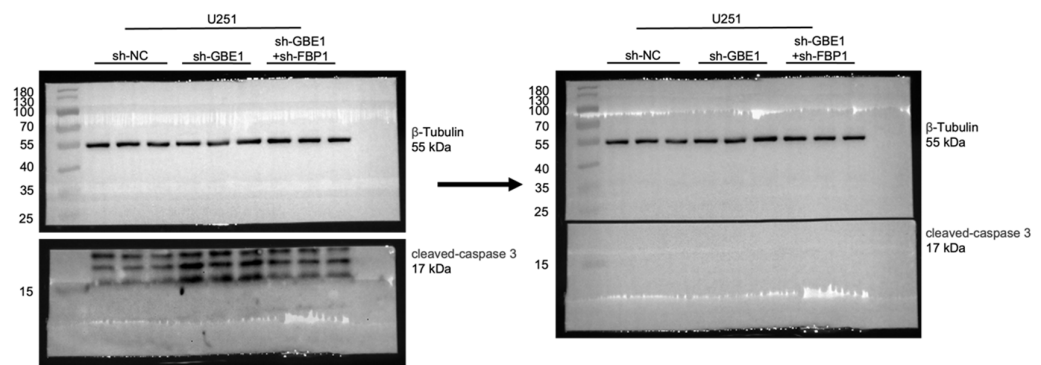

| Line                          | U251<br>sh-<br>NC | U251<br>sh-<br>NC | U251<br>sh-<br>NC | U251<br>sh-<br>GBE1 | U251<br>sh-<br>GBE1 | U251<br>sh-<br>GBE1 | U251<br>sh-<br>GBE1<br>+sh-<br>FBP1 | U251<br>sh-<br>GBE1<br>+sh-<br>FBP1 | U251<br>sh-<br>GBE1<br>+sh-<br>FBP1 |
|-------------------------------|-------------------|-------------------|-------------------|---------------------|---------------------|---------------------|-------------------------------------|-------------------------------------|-------------------------------------|
| Cleav<br>ed-<br>casp<br>ase 3 | 29116.<br>803     | 26235.<br>631     | 33775.<br>359     | 66231.<br>773       | 54547.<br>137       | 58255.<br>702       | 41663.<br>752                       | 33158.<br>217                       | 36380.<br>53                        |
| β-<br>Tubul<br>in             | 62220.<br>51      | 57458.<br>48      | 49622.<br>066     | 48515.<br>338       | 42461.<br>045       | 51922.<br>459       | 58404.<br>217                       | 52861.<br>045                       | 50223.<br>874                       |
